# Supplementary material for: Marine amphipods (Parhyale hawaiensis) as an alternative feed for the lined seahorse (Hippocampus erectus, Perri 1810): nutritional value and feeding trial
Source: PeerJ. 2021 Oct 19;9:e12288. doi: 10.7717/peerj.12288 (PMC8532987; doi:10.7717/peerj.12288)
Supplement: Supplemental Information 5 [file peerj-09-12288-s005.xlsx]

## Sheet: Amphipod lipid content
	Captured amphipods		Biofloc amphipods			Pellet-fed amphipods
Total lipid content %	19.8	21	26.6	28	25.5	27.6	21.5	27.4

## Sheet: Amphipod & Artemia fatty acids
	Captured amphipods				Biofloc amphipods			Pellet-fed amphipods			Enriched Artemia
	Sample 1	Sample 2	Sample 3	Sample 4	Sample 1	Sample 2	Sample 3	Sample 1	Sample 2	Sample 3	Sample 1	Sample 2
C12:0	0.566893	0.580927	0.232435	0.20152	0.734895	0.814292	0.656031	0.897935	0.671433	0.852136	0.0582461	0.0503897
C13:0	0.0568089	0.0592087	0.0596985	0.0579153	0.0578245	0.0637438	0.0491223	0.0632363	0.0442411	0.0606075	0.0467222	0.0420388
C14:0	6.89483	7.3603	4.5689	4.15158	7.27562	8.07924	6.71898	9.30876	7.55918	8.88842	1.58099	1.83566
C14:1	0.0310946	0.0330255	0.0355609	0.0413099	0.0457236	0.0476859	0.0426494	0.0436868	0.0401786	0.0409033	0.0132705	0.0156213
C15:0	0.970587	1.04221	0.983385	0.896017	0.78963	0.824948	0.712335	0.362547	0.721956	0.672466	0.588979	0.68384
C16:0	29.8371	23.6666	11.2105	25.2384	11.0153	14.3289	21.9123	14.5992	14.5459	15.7728	16.389	18.5512
C16:1	0.744509	0.530214	13.672	7.90497	5.03694	8.29078	5.99736	5.58048	7.5757	1.41317	8.44895	9.9821
C17:0	1.92281	2.09501	2.77077	2.60262	1.30906	1.37732	1.22091	0.363834	0.453287	0.189647	2.29877	2.56853
C17:1	0.478354	0.528133	0.570885	0.583245	0.13353	0.387126	0.158246	0.761612	0.332327	0.250431	0.130079	0.155171
C18:0	5.7788	6.34344	11.3656	9.44472	12.2423	16.9694	8.76045	13.0741	16.9233	11.687	8.92124	9.90863
C18:1n9c/t	22.7561	24.7619	22.8333	21.2539	23.751	13.4088	17.5428	11.118	9.8661	4.80491	17.6891	13.7211
C18:2n6c	4.63378	5.04181	6.75322	5.90979	16.4422	12.4159	15.5313	6.0462	10.4059	4.67616	20.0345	21.5352
C18:3n6	1.78982	1.91059	0.561146	0.491232	0.156579	0.209701	0.135738	7.26776	3.7435	5.50563	0	0
C18:3n3	0.3725	0.407481	1.68498	0.148682	2.08284	2.25295	2.02646	2.67628	2.34329	0.735726	2.16945	2.29798
C20:0	0.311032	0.346501	0.461481	0.581574	0.405471	0.511855	0.415812	0.717018	0.70422	0.631801	0.250685	0.293314
C20:1n9	2.10342	2.33519	2.52737	2.39818	3.14943	3.42994	3.08311	4.91919	2.91911	4.52487	1.52804	1.62337
C20:2	0.646758	0.712831	0.957524	0.873473	3.01267	3.21409	2.95389	4.37348	4.15211	4.03518	0.438656	0.454703
C20:3n6	0.974912	1.07871	0.491168	0.424338	0.182503	0.219665	0.17123	0.257594	0.252514	0.234804	0.0294142	0.0754922
C21:0	0.156734	0.175292	0.171979	0.160028	0.122009	0.124509	0.118422	0.158473	0.153376	0.135948	0	0
C20:3n3	0.325676	0.332672	0.403768	0.34999	0.648388	0.682142	0.630901	0.844666	0.798383	0.77594	0	0
C20:4n6	9.42907	10.3784	5.84641	5.0693	2.94315	3.03223	2.78041	3.11808	2.94416	2.88542	5.21766	4.7171
C20:5n3	6.17346	6.75449	7.33116	6.25978	4.20845	4.48074	4.09478	5.91107	5.55805	5.4907	7.60611	6.26912
C22:0	0.397211	0.507731	0.490276	0.399953	0.181579	0.264464	0.218508	0.34594	0.315786	0.293872	0.406457	0.575798
C22:1n9	0.324837	0.360866	0.365797	0.315594	0.170168	0.281701	0.249109	0.402401	0.332666	0.315429	0.164664	0.20718
C22:2	0.0264166	0.0275292	0.171563	0.143878	0.110887	0.149255	0.113892	0.190845	0.181829	0.182105	0.0113024	0.144975
C23:0	0.217542	0.291806	0.188529	0.127176	0.089163	0.144098	0.0922736	0.120851	0.151423	0.129294	0.0295407	0.0572334
C24:0	0.100598	0.121597	0.402815	0.388111	0.0493024	0.0648962	0.0505941	0.0907834	0.0842756	0.0818252	0.0665046	0.0901255
C22:6n3	1.97835	2.21558	2.86851	3.5623	3.65343	3.92961	3.56247	6.38601	6.22574	5.89942	5.66255	3.77862
Σ SFA	47.211	42.5906	32.9064	44.2496	34.2721	43.5677	40.9257	40.1026	42.3284	39.3958	30.6371	34.6568
Σ MUFA	26.4383	28.5493	40.0049	32.4972	32.2868	25.846	27.0732	22.8254	21.0661	11.3497	27.9741	25.7046
Σ PUFA	26.3507	28.8601	27.0695	23.2328	33.4411	30.5863	32.0011	37.072	36.6055	30.4211	41.1696	39.2732
n3 HUFA	8.47748	9.30273	10.6034	10.1721	8.51027	9.09249	8.28815	13.1417	12.5822	12.1661	13.2687	10.0477
Σ n3	8.84998	9.71021	12.2884	10.3207	10.5931	11.3454	10.3146	15.818	14.9255	12.9018	15.4381	12.3457
Σ n6	16.8276	18.4095	13.6519	11.8947	19.7244	15.8775	18.6187	16.6896	17.3461	13.302	25.2815	26.3278
n3/n6	0.525921	0.527456	0.900123	0.867679	0.537055	0.71456	0.553992	0.947776	0.86045	0.969913	0.610647	0.468924
DHA/EPA	0.320461	0.328015	0.391276	0.569077	0.868118	0.877002	0.870002	1.08035	1.12013	1.07444	0.744474	0.602735
EPA/ARA	0.654726	0.650822	1.25396	1.23484	1.42992	1.4777	1.47272	1.89574	1.88782	1.90292	1.45776	1.32902

## Sheet: Seahorse fatty acids
	Amphipod Diet												Mixed Diet												Artemia Diet
	Sample 1-a	Sample 1-b	Sample 2-a	Sample 2-b	Sample 3-a	Sample 3-b	Sample 4-a	Sample 4-b	Sample 5-a	Sample 5-b	Sample 6-a	Sample 6-b	Sample 1-a	Sample 1-b	Sample 2-a	Sample 2-b	Sample 3-a	Sample 3-b	Sample 4-a	Sample 4-b	Sample 5-a	Sample 5-b	Sample 6-a	Sample 6-b	Sample 1-a	Sample 1-b	Sample 2-a	Sample 2-b	Sample 3-a	Sample 3-b	Sample 4-a	Sample 4-b	Sample 5-a	Sample 5-b	Sample 6-a	Sample 6-b
C12:0	0.243774	0.220838	0.2283	0.230587	0.142136	0.167728	0.341591	0.344033	0.199338	0.242582	0.308993	0.292386	0.307995	0.115808	0.191851	0.220125	0.209988	0.226236	0.150185	0.19227	0.192863	0.267957	0.019008	0.0576889	0.0532393	0.014457	0.555626	0.0296107	0.0694587	0.0307919	0.0924282	0.0924282	0.123396	0.0189995	0.0159349	0.012767
C13:0	0.0572852	0.100716	0.0676574	0.0789837	0.0602235	0.0726686	0.0909478	0.105936	0.0602534	0.0968006	0.0798657	0.102209	0.0681958	0.0747215	0.067565	0.085018	0.0679723	0.0851645	0.0534945	0.0776663	0.052077	0.0945377	0.0320442	0.0521906	0.0672746	0.044328	0.0403714	0.0455786	0.0538594	0.0740648	0.0526781	0.0477035	0.0297296	0.0439257	0.0422545	0.0356481
C14:0	3.30181	5.2826	4.21169	4.77641	3.20106	3.82276	5.0671	6.04264	3.57016	4.94576	4.3189	5.34181	5.23712	2.77575	3.75476	4.45834	3.59843	4.37971	3.28998	4.23481	3.11287	5.18002	1.67388	2.08793	1.5841	1.61492	1.63102	1.49999	1.52284	1.58191	1.69414	2.19564	1.28434	1.6549	1.49823	1.47488
C14:1	0.0217971	0.0333757	0.0263469	0.0318042	0.0191539	0.0202848	0.0371002	0.0373266	0.0205257	0.0238633	0.0305264	0.0325121	0	0.0141888	0.0204652	0.0228703	0.0201377	0.0201891	0.0158802	0.0194686	0.0194245	0.0258827	0	0	0.0147101	0	0.0328874	0.0137059	0.0142372	1.02116	0	0	0	0	0	0
C15:0	0.69341	1.09965	0.791851	0.907279	0.699522	0.801867	0.91174	1.10605	0.717827	0.963478	0.82166	1.05152	0.958491	0.714959	0.708026	0.843773	0.742183	0.930762	0.715257	0.850613	0.643972	0.996666	0.547144	0.673523	0.59976	0.618997	0.561207	0.53161	0.618759	0.54606	0.664874	0.70892	0.506036	0.616357	0.575234	0.558232
C15:1	0.0392523	0.0486168	0.0476068	0.0307946	0.0464439	0.0437583	0.0073433	0.0066754	0.0167326	0.0194079	0	0.00492954	0	0.043248	0.0111938	0.0773852	0.0187703	0.0381406	0.00913471	0.0112683	0.00869234	0.0154148	0.0176977	0.0264266	0.0291816	0	0	0.0271023	0.0653115	0	0.0875717	0	0.0197416	0.0270586	0.0281973	0.0369266
C16:0	21.9389	26.211	24.3301	24.9605	21.3584	24.7133	21.9177	25.4796	22.8856	19.0462	24.1461	31.5787	29.7933	18.9171	22.5342	26.5688	24.2535	29.781	21.7313	26.1383	21.6919	32.1762	20.0731	24.4451	19.6929	20.1033	16.6186	18.3756	20.8923	19.8692	21.639	24.387	16.1257	19.9934	18.5632	18.0025
C16:1	6.63825	11.4193	8.33638	10.1416	5.9765	6.96844	4.85469	7.40743	7.25226	10.0049	8.83055	11.9207	5.78029	1.03495	7.28133	8.58223	6.67675	7.18032	5.67843	7.30422	7.81984	9.83485	3.42045	3.86437	5.10367	4.8956	4.16688	5.43035	4.95568	4.45671	4.41206	4.78246	4.33394	5.36114	4.38896	4.30631
C17:0	1.11656	2.34819	1.04464	2.35373	1.07875	1.40338	1.25852	2.59519	1.36292	1.80419	1.09517	1.38372	1.19824	2.75221	1.17726	1.44045	1.19676	1.5312	1.03616	1.23012	1.93861	1.58904	1.27714	1.59869	2.12181	1.83109	1.32459	2.11596	1.85931	1.64621	1.82233	1.91682	1.36022	1.6931	2.1217	1.58687
C17:1	0.654561	0.895761	0.380984	0.709719	0.165002	0.716331	0.467715	0.70448	0.308554	0.555525	0.151511	0.672478	0.795256	0.617065	0.62862	0.698645	0.604692	0.441989	0.136272	0.399616	0.557226	0.726784	1.62771	0.133711	1.29463	1.16252	1.08427	1.07439	1.39345	1.02359	1.12121	0.75707	0.95464	1.35578	1.32969	0.551174
C18:0	14.099	7.31828	12.241	14.6871	13.7577	16.2429	11.8565	14.6584	12.7088	17.0331	11.6658	2.80657	12.2488	19.2157	13.1353	15.1128	13.3159	16.5963	12.8447	14.847	12.5902	16.5405	16.3791	19.9932	19.7731	19.9583	14.3351	16.8801	19.3969	17.9448	18.7353	18.9239	14.9108	17.8967	16.8666	16.9936
C18:1n9c/t	17.1804	27.0053	17.7562	20.4241	17.8668	19.1153	22.2451	21.7414	18.3759	21.726	17.6875	23.3654	15.1331	21.3805	17.851	18.9949	19.0639	19.5745	17.5903	19.5109	18.0812	8.56671	8.92909	10.2368	15.5106	14.1235	19.6251	23.2067	23.6252	20.2742	22.9617	22.1174	18.8328	21.3594	20.722	21.0593
C18:2n6c	3.48997	3.30262	3.29563	3.00275	3.65141	3.53799	3.8517	3.21856	3.2975	3.33402	3.68323	3.55139	7.44286	7.72557	6.18187	5.71521	4.31669	3.71742	4.22688	3.8601	5.17352	5.25315	10.3962	10.4957	16.6178	15.8761	16.359	14.2623	14.1799	15.064	14.1298	13.1381	16.1643	13.9653	15.098	15.1065
C18:3n6	0.326242	0.207925	0.351915	0.288636	0.362656	0.322834	0.49082	0.32533	0.305507	0.273806	0.456522	0.330215	0.450527	0.467586	0.513877	0.416246	0.30473	0.201265	0.33194	0.252391	0.53894	0.424565	0.665619	0.556268	0.801451	0.654227	0.733031	0.700347	0.397127	0.505372	0.406343	0.325768	0.621543	0.493959	0.647926	0.616167
C18:3n3	0.945833	0.719185	1.05762	0.870449	1.09227	0.960589	1.49676	1.07087	0.794454	0.77346	1.29597	0.995809	0.568389	0.666296	1.00735	0.843738	0.810289	0.625146	0.803997	0.709141	1.07456	0.936117	0.630993	0.553058	0.691046	0.709184	0.909936	0.673021	0.478069	0.56948	0.422232	0.344802	0.621343	0.548304	0.623319	0.67307
C20:0	0.524338	0.678985	0.391161	0.399874	0.465539	0.389216	0.445434	0.53763	0.391353	0.467734	0.448522	0.569625	0.179048	0.0797915	0.369231	0.416526	0.393428	0.518388	0.534353	0.481602	0.40405	0.68655	0.427013	0.479686	0.531971	0.718065	0.590272	0.440037	0.539362	0.529833	0.500039	0.412761	0.570043	0.58738	0.592213	0.678292
C20:1n9	1.18722	1.69853	1.27508	1.33423	1.14985	1.15899	1.76488	1.6944	1.28148	1.48007	1.4294	1.75691	0.564966	1.23979	1.09008	1.2483	1.25353	1.45501	1.60793	1.42339	1.25651	1.48082	1.00334	1.0383	0.796685	0.845894	0.723685	0.789095	0.756436	0.799247	0.773652	0.652664	0.984522	0.89133	0.816263	0.82478
C20:2	0.540827	0.556612	0.518581	0.438221	0.418103	0.484952	0.624279	0.482906	0.507119	0.465629	0.541316	0.585509	0.265339	0.450669	0.390246	0.384055	0.445993	0.382145	0.708593	0.48517	0.47092	0.429101	0.429244	0.379399	0.343379	0.521409	0.313753	0.299739	0.259991	0.280373	0.282439	0.281002	0.528192	0.35888	0.29348	0.458959
C20:3n6	0.387957	0.273812	0.368008	0.280396	0.400432	0.378009	0.435009	0.282278	0.388554	0.30261	0.411362	0.349733	0.196491	0.389853	0.380407	0.293596	0.370371	0.254699	0.386598	0.318213	0.383169	0.273243	0.44514	0.370793	0.339963	0.326948	0.356786	0.316128	0.238311	0.273561	0.245214	0.270498	0.38829	0.312016	0.373115	0.375598
C21:0	0.127873	0.178147	0.146065	0.121431	0.118779	0.119079	0.143172	0.163321	0.127587	0.144096	0.11326	0.176861	0	0	0.0824464	0.0998844	0.11404	0.149715	0.0536239	0.13804	0.101733	0.0933369	0.11484	0.128765	0.157399	0.124116	0.0837266	0.153829	0.202631	0.118099	0.143083	0.385197	0.05062	0.174469	0.201141	0.232004
C20:4n6	9.71847	4.34648	8.50046	5.59275	11.0318	7.80954	7.74995	4.35568	10.2406	7.02058	8.14971	5.22669	8.03972	8.45822	8.10683	5.24437	9.42954	5.24834	11.4779	7.77384	8.603	5.70951	12.8308	9.76346	5.41954	5.56902	7.06201	4.81583	3.398	5.29713	4.57267	3.80904	8.05974	4.86353	6.78215	6.76831
C20:3n3	0.28178	0.234997	0.343415	0.255429	0.257202	0.291017	0.428961	0.304812	0.298022	0.242821	0.33641	0.291163	0.239636	0.212517	0.224847	0.192269	0.238263	0.182347	0.29035	0.247291	0.327926	0.194042	0.153385	0.105801	0.0700798	0.0390199	0.0706136	0.0857049	0.167019	0.101431	0.0989922	0	0.0662468	0.0312593	0.0572592	0.0264404
C20:5n3	6.44967	1.97222	6.04251	3.40868	5.65656	3.64543	6.71446	3.20834	5.07866	3.07034	6.77508	3.34938	3.34844	3.52499	5.82559	3.49039	4.37628	2.11303	4.9472	2.97037	6.66228	3.89459	4.68521	3.17041	2.31687	2.65216	3.67792	2.49258	1.30369	2.40101	1.38831	1.13888	3.91469	2.25979	2.49882	2.62422
C22:0	0.36638	0.520722	0.404286	0.384365	0.456668	0.409471	0.46068	0.536797	0.441556	0.527534	0.347694	0.488547	0.124654	0.658479	0.374771	0.419649	0.458588	0.603313	0.643058	0.55014	0.396811	0.474542	0.542879	0.669185	0.780506	1.0395	0.65516	0.695728	0.845382	0.981474	0.741395	0.800919	0.803953	0.817942	0.773043	0.909647
C22:1n9	0.280092	0.367728	0.312605	0.255543	0.360289	0.278405	0.332624	0.357255	0.257649	0.308906	0.244938	0.361025	1.16031	0.301507	0.204041	0.261349	0.265106	0.216732	0.290766	0.315545	0.29054	0.271279	0.288014	0.344279	0.336451	0.446304	0.266841	0.239726	0.378233	0.414619	0.244429	0.0824113	0.285538	0.269409	0.286458	0.310515
C22:2	0.318787	0.151782	0.388366	0.0998159	0.239513	0.114343	0.0852895	0.122667	0.195539	0.101627	0.204956	0.0967676	0	0.13522	0.18825	0.0726025	0.14512	0.11161	0.383733	0.136044	0.304836	0.0585134	0.165513	0.0534922	0.0928062	0.0633786	0.132155	0.0704737	0.0339303	0.0211757	0	0	0.170277	0.0430413	0.128209	0.159009
C23:0	0.125474	0.11155	0.140554	0.0677893	0.0660282	0.0506787	0.0963529	0.0757663	0.0808886	0.12695	0.0748356	0.103936	0.173288	0.142988	0.0431588	0.0792409	0.0501797	0.148614	0.231587	0.130128	0.101719	0.0645893	0.0686495	0.127203	0.144572	0.240193	0.0836057	0.0955386	0.148695	0.141839	0.139422	0.179486	0.0743005	0.121372	0.183368	0.155972
C24:0	0.233231	0.322282	0.244593	0.246382	0.286656	0.302076	0.239685	0.288764	0.342132	0.387955	0.198795	0.285877	0.0860191	0.503144	0.215942	0.217653	0.241824	0.334307	0.431938	0.360751	0.206809	0.246492	0.344073	0.413068	0.471074	0.666323	0.376189	0.385112	0.444846	0.482153	0.354602	0.421715	0.477865	0.473155	0.374844	0.507128
C22:6n3	8.71095	2.37282	6.75641	3.62063	9.61454	5.65866	5.58387	2.74547	8.49248	4.51013	6.1514	2.92758	5.6395	7.38708	7.43947	3.49954	7.01705	2.95242	9.39832	5.03155	6.99392	3.49497	12.8127	8.18138	4.24351	5.14113	7.6297	4.25415	1.76122	3.55058	2.36653	1.96765	7.73731	3.76817	4.11849	4.95522
Σ SFA	42.828	44.3929	44.2419	49.2144	41.6915	48.4952	42.8294	51.9341	42.8884	45.7863	43.6197	44.1818	50.3752	45.9507	42.6545	49.9623	44.6428	55.2847	41.7157	49.2315	41.4335	58.4105	41.4988	50.7263	45.9776	46.9736	36.8554	41.2486	46.5943	43.9464	46.5793	50.4724	36.317	44.0917	41.8077	41.1475
Σ MUFA	26.0015	41.4686	28.1352	32.9278	25.5841	28.3015	29.7094	31.9489	27.5131	34.1187	28.3744	38.114	23.4339	24.6313	27.0868	29.8857	27.9028	28.9269	25.3288	28.9844	28.0334	20.9217	15.2863	15.6439	23.0859	21.4738	25.8997	30.7811	31.1885	27.9895	29.6007	28.392	25.4111	29.2641	27.5715	27.089
Σ PUFA	31.1705	14.1385	27.6229	17.8578	32.7244	23.2034	27.4611	16.1169	29.5985	20.095	28.0059	17.7042	26.1909	29.418	30.2587	20.152	27.4543	15.7884	32.9555	21.7841	30.5331	20.6678	43.2149	33.6298	30.9364	31.5526	37.2449	27.9703	22.2172	28.0641	23.9125	21.2757	38.2719	26.6442	30.6208	31.7635
n3 HUFA	15.4424	4.58004	13.1423	7.28474	15.5283	9.5951	12.7273	6.25862	13.8692	7.82329	13.2629	6.56812	9.22758	11.1246	13.4899	7.1822	11.6316	5.24779	14.6359	8.24922	13.9841	7.5836	17.6513	11.4576	6.63046	7.83231	11.3782	6.83244	3.23193	6.05302	3.85383	3.10653	11.7182	6.05923	6.67457	7.60587
Σ n3	16.3882	5.29922	14.2	8.15519	16.6206	10.5557	14.2241	7.32949	14.6636	8.59675	14.5589	7.56393	9.79597	11.7909	14.4973	8.02594	12.4419	5.87294	15.4399	8.95836	15.0587	8.51972	18.2823	12.0107	7.3215	8.5415	12.2882	7.50546	3.71	6.6225	4.27606	3.45133	12.3396	6.60753	7.29789	8.27894
Σ n6	13.9226	8.13084	12.516	9.16453	15.4463	12.0484	12.5275	8.18185	14.2322	10.931	12.7008	9.45803	16.1296	17.0412	15.183	11.6694	14.4213	9.42172	16.4234	12.2045	14.6986	11.6605	24.3378	21.1863	23.1787	22.4263	24.5108	20.0946	18.2133	21.14	19.354	17.5434	25.2338	19.6348	22.9012	22.8666
n3/n6	1.17709	0.651744	1.13454	0.889865	1.07603	0.87611	1.13543	0.895824	1.03031	0.786454	1.14629	0.799737	0.607329	0.691903	0.954836	0.687775	0.862741	0.62334	0.940116	0.734018	1.0245	0.73065	0.751191	0.566908	0.315871	0.38087	0.501337	0.373506	0.203697	0.313269	0.220939	0.196731	0.48901	0.336522	0.318669	0.362055
DHA/EPA	1.3506	1.20312	1.11815	1.06218	1.69972	1.55226	0.831619	0.85573	1.67219	1.46894	0.907945	0.874068	1.68421	2.09563	1.27703	1.00262	1.60343	1.39725	1.89972	1.69391	1.04978	0.897389	2.73472	2.58054	1.83157	1.93847	2.07446	1.70673	1.35095	1.47879	1.70461	1.7277	1.97648	1.66749	1.64817	1.88826
EPA/ARA	0.663651	0.45375	0.710846	0.609482	0.512752	0.466792	0.866388	0.736587	0.495932	0.437334	0.831328	0.640821	0.416488	0.416754	0.718603	0.66555	0.464103	0.402609	0.431018	0.382099	0.774414	0.682123	0.365152	0.324722	0.427503	0.476235	0.520803	0.51758	0.383664	0.453266	0.30361	0.298995	0.485709	0.46464	0.368441	0.387721

## Sheet: Feeding trial
ID	Sistem	Wet weight (g)	Treatment	Sex	Time (day)	Time
2	13	1.12	Artemia Diet	Female	0	1
42	13	1.19	Artemia Diet	Male	0	1
46	13	1.09	Artemia Diet	Female	0	1
36	13	1.03	Artemia Diet	Female	0	1
47	14	2.48	Artemia Diet	Male	0	1
39	14	1.71	Artemia Diet	Male	0	1
13	14	1.41	Artemia Diet	Female	0	1
7	14	1.33	Artemia Diet	Female	0	1
21	19	1.53	Artemia Diet	Female	0	1
40	19	1.17	Artemia Diet	Male	0	1
29	19	1.29	Artemia Diet	Female	0	1
34	19	0.89	Artemia Diet	Male	0	1
6	22	1.82	Artemia Diet	Male	0	1
16	22	1.54	Artemia Diet	Female	0	1
44	22	0.79	Artemia Diet	Male	0	1
10	22	0.85	Artemia Diet	Male	0	1
30	16	1.28	Mixed Diet	Male	0	1
3	16	1.48	Mixed Diet	Male	0	1
19	16	1.18	Mixed Diet	Female	0	1
5	16	1.06	Mixed Diet	Female	0	1
33	17	1.95	Mixed Diet	Male	0	1
25	17	2.01	Mixed Diet	Male	0	1
11	17	1.16	Mixed Diet	Female	0	1
31	17	0.98	Mixed Diet	Female	0	1
32	21	1.89	Mixed Diet	Male	0	1
43	21	1.39	Mixed Diet	Female	0	1
24	21	1.44	Mixed Diet	Female	0	1
18	21	0.72	Mixed Diet	Female	0	1
12	24	1.91	Mixed Diet	Male	0	1
48	24	0.77	Mixed Diet	Female	0	1
41	24	1.04	Mixed Diet	Female	0	1
20	24	1.35	Mixed Diet	Female	0	1
28	15	1.99	Amphipod Diet	Female	0	1
38	15	1.49	Amphipod Diet	Female	0	1
14	15	1.14	Amphipod Diet	Female	0	1
8	15	1.18	Amphipod Diet	Male	0	1
23	18	1.33	Amphipod Diet	Female	0	1
27	18	1.25	Amphipod Diet	Female	0	1
26	18	1.2	Amphipod Diet	Male	0	1
22	18	0.97	Amphipod Diet	Female	0	1
37	20	1.29	Amphipod Diet	Male	0	1
15	20	1.47	Amphipod Diet	Female	0	1
1	20	0.96	Amphipod Diet	Female	0	1
9	20	1.15	Amphipod Diet	Male	0	1
17	23	1.36	Amphipod Diet	Male	0	1
35	23	1.19	Amphipod Diet	Male	0	1
45	23	1.13	Amphipod Diet	Female	0	1
4	23	1.54	Amphipod Diet	Male	0	1
2	13	1.25	Artemia Diet	Female	15	2
42	13	1.16	Artemia Diet	Male	15	2
46	13	1.13	Artemia Diet	Female	15	2
36	13	1.06	Artemia Diet	Female	15	2
47	14	2.55	Artemia Diet	Male	15	2
39	14	1.81	Artemia Diet	Male	15	2
13	14	1.57	Artemia Diet	Female	15	2
7	14	1.41	Artemia Diet	Female	15	2
21	19	1.55	Artemia Diet	Female	15	2
40	19	1.38	Artemia Diet	Male	15	2
29	19	1.37	Artemia Diet	Female	15	2
34	19	0.95	Artemia Diet	Male	15	2
6	22	1.94	Artemia Diet	Male	15	2
16	22	1.5	Artemia Diet	Female	15	2
44	22	1	Artemia Diet	Male	15	2
10	22	0.86	Artemia Diet	Male	15	2
30	16	1.6	Mixed Diet	Male	15	2
3	16	1.5	Mixed Diet	Male	15	2
19	16	1.25	Mixed Diet	Female	15	2
5	16	1.2	Mixed Diet	Female	15	2
33	17	2.34	Mixed Diet	Male	15	2
25	17	2.04	Mixed Diet	Male	15	2
11	17	1.49	Mixed Diet	Female	15	2
31	17	0.92	Mixed Diet	Female	15	2
32	21	2.19	Mixed Diet	Male	15	2
43	21	1.7	Mixed Diet	Female	15	2
24	21	1.5	Mixed Diet	Female	15	2
18	21	0.76	Mixed Diet	Female	15	2
12	24	2.29	Mixed Diet	Male	15	2
48	24	0.99	Mixed Diet	Female	15	2
41	24	1.16	Mixed Diet	Female	15	2
20	24	1.32	Mixed Diet	Female	15	2
28	15	2.17	Amphipod Diet	Female	15	2
38	15	1.75	Amphipod Diet	Female	15	2
14	15	1.35	Amphipod Diet	Female	15	2
8	15	1.21	Amphipod Diet	Male	15	2
23	18	1.38	Amphipod Diet	Female	15	2
27	18	1.37	Amphipod Diet	Female	15	2
26	18	1.35	Amphipod Diet	Male	15	2
22	18	1.22	Amphipod Diet	Female	15	2
37	20	1.45	Amphipod Diet	Male	15	2
15	20	1.44	Amphipod Diet	Female	15	2
1	20	1.25	Amphipod Diet	Female	15	2
9	20	1.24	Amphipod Diet	Male	15	2
17	23	1.92	Amphipod Diet	Male	15	2
35	23	1.69	Amphipod Diet	Male	15	2
45	23	1.49	Amphipod Diet	Female	15	2
4	23	1.38	Amphipod Diet	Male	15	2
2	13	1.2	Artemia Diet	Female	30	3
42	13	1.03	Artemia Diet	Male	30	3
46	13	1.09	Artemia Diet	Female	30	3
36	13	1.04	Artemia Diet	Female	30	3
47	14	2.5	Artemia Diet	Male	30	3
39	14	1.74	Artemia Diet	Male	30	3
13	14	1.67	Artemia Diet	Female	30	3
7	14	1.45	Artemia Diet	Female	30	3
21	19	1.57	Artemia Diet	Female	30	3
40	19	1.35	Artemia Diet	Male	30	3
29	19	1.34	Artemia Diet	Female	30	3
34	19	0.9	Artemia Diet	Male	30	3
6	22	1.71	Artemia Diet	Male	30	3
16	22	1.47	Artemia Diet	Female	30	3
44	22	0.97	Artemia Diet	Male	30	3
10	22	0.87	Artemia Diet	Male	30	3
30	16	1.76	Mixed Diet	Male	30	3
3	16	1.48	Mixed Diet	Male	30	3
19	16	1.26	Mixed Diet	Female	30	3
5	16	1.32	Mixed Diet	Female	30	3
33	17	2.74	Mixed Diet	Male	30	3
25	17	2.32	Mixed Diet	Male	30	3
11	17	1.72	Mixed Diet	Female	30	3
31	17	0.81	Mixed Diet	Female	30	3
32	21	2.47	Mixed Diet	Male	30	3
43	21	1.89	Mixed Diet	Female	30	3
24	21	1.59	Mixed Diet	Female	30	3
18	21	0.86	Mixed Diet	Female	30	3
12	24	2.49	Mixed Diet	Male	30	3
48	24	1.21	Mixed Diet	Female	30	3
41	24	1.29	Mixed Diet	Female	30	3
20	24	1.32	Mixed Diet	Female	30	3
28	15	2.32	Amphipod Diet	Female	30	3
38	15	2.04	Amphipod Diet	Female	30	3
14	15	1.45	Amphipod Diet	Female	30	3
8	15	1.35	Amphipod Diet	Male	30	3
23	18	1.72	Amphipod Diet	Female	30	3
27	18	1.35	Amphipod Diet	Female	30	3
26	18	1.47	Amphipod Diet	Male	30	3
22	18	1.57	Amphipod Diet	Female	30	3
37	20	1.52	Amphipod Diet	Male	30	3
15	20	1.69	Amphipod Diet	Female	30	3
1	20	1.32	Amphipod Diet	Female	30	3
9	20	1.47	Amphipod Diet	Male	30	3
17	23	2.04	Amphipod Diet	Male	30	3
35	23	1.9	Amphipod Diet	Male	30	3
45	23	1.67	Amphipod Diet	Female	30	3
4	23	1.49	Amphipod Diet	Male	30	3
2	13	1.21	Artemia Diet	Female	45	4
42	13	1.12	Artemia Diet	Male	45	4
46	13	1.09	Artemia Diet	Female	45	4
36	13	1.07	Artemia Diet	Female	45	4
47	14	2.43	Artemia Diet	Male	45	4
39	14	1.73	Artemia Diet	Male	45	4
13	14	1.59	Artemia Diet	Female	45	4
7	14	1.57	Artemia Diet	Female	45	4
21	19	1.61	Artemia Diet	Female	45	4
40	19	1.55	Artemia Diet	Male	45	4
29	19	1.44	Artemia Diet	Female	45	4
34	19	0.94	Artemia Diet	Male	45	4
6	22	1.75	Artemia Diet	Male	45	4
16	22	1.52	Artemia Diet	Female	45	4
44	22	0.97	Artemia Diet	Male	45	4
10	22	0.99	Artemia Diet	Male	45	4
30	16	2	Mixed Diet	Male	45	4
3	16	1.44	Mixed Diet	Male	45	4
19	16	1.28	Mixed Diet	Female	45	4
5	16	1.4	Mixed Diet	Female	45	4
33	17	2.87	Mixed Diet	Male	45	4
25	17	2.61	Mixed Diet	Male	45	4
11	17	1.8	Mixed Diet	Female	45	4
31	17	0.78	Mixed Diet	Female	45	4
32	21	2.81	Mixed Diet	Male	45	4
43	21	2.03	Mixed Diet	Female	45	4
24	21	1.71	Mixed Diet	Female	45	4
18	21	1.03	Mixed Diet	Female	45	4
12	24	2.78	Mixed Diet	Male	45	4
48	24	1.51	Mixed Diet	Female	45	4
41	24	1.39	Mixed Diet	Female	45	4
20	24	1.32	Mixed Diet	Female	45	4
28	15	2.62	Amphipod Diet	Female	45	4
38	15	2.22	Amphipod Diet	Female	45	4
14	15	1.74	Amphipod Diet	Female	45	4
8	15	1.77	Amphipod Diet	Male	45	4
23	18	1.87	Amphipod Diet	Female	45	4
27	18	1.54	Amphipod Diet	Female	45	4
26	18	1.8	Amphipod Diet	Male	45	4
22	18	1.92	Amphipod Diet	Female	45	4
37	20	1.79	Amphipod Diet	Male	45	4
15	20	1.78	Amphipod Diet	Female	45	4
1	20	1.39	Amphipod Diet	Female	45	4
9	20	1.67	Amphipod Diet	Male	45	4
17	23	2.42	Amphipod Diet	Male	45	4
35	23	2.11	Amphipod Diet	Male	45	4
45	23	1.92	Amphipod Diet	Female	45	4
4	23	1.66	Amphipod Diet	Male	45	4
2	13	1.13	Artemia Diet	Female	57	5
42	13	1.07	Artemia Diet	Male	57	5
46	13	1.06	Artemia Diet	Female	57	5
36	13	1.03	Artemia Diet	Female	57	5
47	14	2.26	Artemia Diet	Male	57	5
39	14	1.69	Artemia Diet	Male	57	5
13	14	1.46	Artemia Diet	Female	57	5
7	14	1.45	Artemia Diet	Female	57	5
21	19	1.51	Artemia Diet	Female	57	5
40	19	1.5	Artemia Diet	Male	57	5
29	19	1.37	Artemia Diet	Female	57	5
34	19	0.91	Artemia Diet	Male	57	5
6	22	1.65	Artemia Diet	Male	57	5
16	22	1.41	Artemia Diet	Female	57	5
44	22	0.94	Artemia Diet	Male	57	5
10	22	0.98	Artemia Diet	Male	57	5
30	16	2.02	Mixed Diet	Male	57	5
3	16	1.56	Mixed Diet	Male	57	5
19	16	1.42	Mixed Diet	Female	57	5
5	16	1.55	Mixed Diet	Female	57	5
33	17	3.23	Mixed Diet	Male	57	5
25	17	2.78	Mixed Diet	Male	57	5
11	17	2.21	Mixed Diet	Female	57	5
31	17	0.84	Mixed Diet	Female	57	5
32	21	3.31	Mixed Diet	Male	57	5
43	21	2.13	Mixed Diet	Female	57	5
24	21	1.89	Mixed Diet	Female	57	5
18	21	1.24	Mixed Diet	Female	57	5
12	24	3.03	Mixed Diet	Male	57	5
48	24	1.8	Mixed Diet	Female	57	5
41	24	1.64	Mixed Diet	Female	57	5
20	24	1.5	Mixed Diet	Female	57	5
28	15	2.76	Amphipod Diet	Female	57	5
38	15	2.42	Amphipod Diet	Female	57	5
14	15	1.78	Amphipod Diet	Female	57	5
8	15	1.95	Amphipod Diet	Male	57	5
23	18	2.03	Amphipod Diet	Female	57	5
27	18	1.61	Amphipod Diet	Female	57	5
26	18	2.04	Amphipod Diet	Male	57	5
22	18	1.99	Amphipod Diet	Female	57	5
37	20	1.95	Amphipod Diet	Male	57	5
15	20	1.81	Amphipod Diet	Female	57	5
1	20	1.35	Amphipod Diet	Female	57	5
9	20	1.78	Amphipod Diet	Male	57	5
17	23	2.75	Amphipod Diet	Male	57	5
35	23	2.63	Amphipod Diet	Male	57	5
45	23	1.86	Amphipod Diet	Female	57	5
4	23	1.96	Amphipod Diet	Male	57	5
